# Supplementary material for: Development of Genetically Encoded Fluorescent KSR1-Based Probes to Track Ceramides during Phagocytosis
Source: MDPI journal article supplement (doi:10.3390/ijms25052996), 2024-03-05
Supplement: s1 [file s1]

## **Supplementary Materials**

### **List of Supplementary Materials:**

1. Supplementary Figures (separate file):
  - Figures S1 to S6 (file name: Supplementary\_Figures.pdf)
2. Supplementary Tables: (below)
  - a) **Supplementary Table S1:** List of lipids used in this study.
  - b) **Supplementary Table S2:** List of plasmids used and generated in this study.
  - c) **Supplementary Table S3:** List of primers used in this study.
  - d) **Supplementary Table S4:** Lipid detection parameters for lipidomic analysis
3. Supplementary Data (separate files):
  - a) **Supplementary Data S1:** Lipidomic data of wild-type (WT) MEF, or MEF cells stably expressing C-KSR-EGFP cells treated with myriocin, palmitate, sphingomyelinase (worksheets tabs T1 to T3); or MEF cells stably expressing C-KSR-EGFP, transfected with FCGR2A-c-myc and phagocytosing for 0, 30 and 135 min (worksheets T4-T6). Lipid class nomenclature and grouping are summarized in worksheet T7.  
(file name: Supplementary\_Data\_S1.xlsx)
  - b) **Supplementary Data S2:** Liposome microarray quantification using purified C-KSR-sfGFP and N-KSR-sfGFP on DOPC liposomes (worksheet tab T1), HEK lysates of C-KSR-GS-EGFP and N-KSR-EGFP on DOPC liposomes (worksheet tab T2), and HEK lysates of C-KSR-GS-EGFP, EGFP and PKC-C1(2) on IPM liposomes (worksheet tab T3). DOPC: dioleoyl-phosphatidylcholine; IPM: inner plasma membrane mimic.  
(file name: Supplementary\_Data\_S2.xlsx)

**Supplementary Table S1.** List of lipids used in liposome microarray analysis.

| Lipid Catalog Name                                                                                 | Lipid Abbreviation | Symbols/Abbreviations/Other names                                       | Source              | Catalog#    |
|----------------------------------------------------------------------------------------------------|--------------------|-------------------------------------------------------------------------|---------------------|-------------|
| 1,2-dioleoyl-sn-glycero-3-phosphate (sodium salt)                                                  | DOPA               | DOPA, 18:1 PA, phosphatidic acid                                        | Avanti Lipids Polar | 840875P     |
| 1,2-dioleoyl-sn-glycero-3-phospho-(1'-myo-inositol-4',5'-bisphosphate) (ammonium salt)             | PI(4,5)P2          | DOPI(4,5)P2, PIP2[4',5'](18:1(9Z)/18:1(9Z)) PI(4,5)P2                   | Avanti Lipids Polar | 850155P     |
| 1,2-dioleoyl-sn-glycero-3-phosphocholine                                                           | DOPC               | 18:1 ( $\Delta$ 9-Cis) PC (DOPC) phosphatidylcholine                    | Avanti Lipids Polar | 850375P     |
| 1,2-dioleoyl-sn-glycero-3-phosphoethanolamine                                                      | PE-Atto647         | DOPE-Atto647 phosphatidylethanolamine                                   | Atto Tec            | AD 647N-161 |
| 1,2-dioleoyl-sn-glycero-3-phosphoethanolamine-N-[methoxy(polyethylene glycol)-350] (ammonium salt) | PE-PEG350          | PE-PEG350 (18:1) phosphatidylethanolamine                               | Avanti Lipids Polar | 880430O     |
| 1,2-dioleoyl-sn-glycero-3-phospho-L-serine (sodium salt)                                           | DOPS               | 18:1 PS (DOPS), phosphatidylserine                                      | Avanti Lipids Polar | 840035P     |
| 1-2-dioleoyl-sn-glycerol                                                                           | DAG                | 18:1 DG, diacylglycerol                                                 | Avanti Lipids Polar | 800811O     |
| 1-palmitoyl-2-oleoyl-glycero-3-phosphocholine                                                      | POPC               | 6:0-18:1 PC (POPC), phosphatidylcholine                                 | Avanti Lipids Polar | 850457P     |
| 1-palmitoyl-2-oleoyl-sn-glycero-3-phosphoethanolamine                                              | POPE               | 16:0-18:1 PE, POPE, phosphatidylethanolamine                            | Avanti Lipids Polar | 850757P     |
| Ceramide from bovine spinal cord <sup>1</sup>                                                      | CER                | CerMix, bovine ceramide mixture                                         | MilliporeSigma      | 22244       |
| cholesterol                                                                                        | Chol               | 3 $\beta$ -Hydroxy-5-cholestene, 5-Cholesten-3 $\beta$ -ol, cholesterol | MilliporeSigma      | C8667       |
| D-erythro-sphingosine                                                                              | Sph                | Sphingosine (d18:1)                                                     | Avanti Lipids Polar | 860490P     |
| D-erythro-sphingosine-1-phosphate                                                                  | S1P                | Sphingosine-1-Phosphate (d18:1)                                         | Avanti Lipids Polar | 860492P     |
| D-glucosyl- $\beta$ -1,1'-N-heptadecanoyl-D-erythro-sphingosine                                    | GlcCer             | glucosyl-ceramide, C17 Glucosyl( $\beta$ ) Ceramide (d18:1/17:0)        | Avanti Lipids Polar | 860569P     |
| N-(hexadecanoyl)-sphing-4-enine-1-phosphocholine                                                   | SM                 | 16:0 SM, C16-sphingomyelin, Egg SM                                      | Avanti Lipids Polar | 860061P     |
| N-palmitoyl-ceramide-1-phosphate (ammonium salt)                                                   | Cer1P              | C1P, C16-ceramide-1-phosphate (d18:1/16:0)                              | Avanti Lipids Polar | 860533P     |
| N-stearoyl-D-erythro-sphinganine                                                                   | DHCer              | C18 Dihydroceramide (d18:0/18:0)                                        | Avanti Lipids Polar | 860627P     |
| N-stearoyl-D-erythro-sphingosine                                                                   | C18Cer             | C18 Ceramide (d18:1/18:0)                                               | Avanti Lipids Polar | 860518P     |

1. Made from hydrolysis of total bovine brain sphingomyelins. Major components estimated to be 30% C18-ceramide 35% C24-dihydroceramide in [66]

**Supplementary Table S2.** List of plasmids used in the study.

| Name (short name)            | Vector     | Insert                                                                           | Source                     |
|------------------------------|------------|----------------------------------------------------------------------------------|----------------------------|
| pKSR1-CA3-EGFP (C-KSR)       | pEGFP-N1   | Human KSR1 CA3 domain (aa317-400)                                                | This study Addgene #217753 |
| pKSR1-CA3-mRFP1 (C-KSR)      | pmRFP1-N1  | Human KSR1 CA3 domain (aa317-400)                                                | This study Addgene #217754 |
| pEGFP-KSR1-CA3 (N-KSR)       | pEGFP-C1   | Human KSR1 CA3 domain (aa317-400)                                                | This study Addgene #217755 |
| p2X-KSR1-CA3-EGFP (2x-C-KSR) | pEGFP-N1   | 2x Human KSR1 (aa317-400) fragments in tandem                                    | This study Addgene #217756 |
| pKSR1-CA3-GS-EGFP (C-KSR-GS) | pKSR1-EGFP | GGSSGGGGA flexible linker between the Human KSR1 CA3 domain (aa317-400) and EGFP | This study Addgene #217757 |

|                                            |                             |                                                                                                                   |                                                                           |
|--------------------------------------------|-----------------------------|-------------------------------------------------------------------------------------------------------------------|---------------------------------------------------------------------------|
| pKSR1-CA3-GS-mRFP1<br>(C-KSR-GS)           | pKSR1-mRFP1                 | GGSSGGGGA flexible linker<br>between the Human KSR1 CA3<br>domain (aa317-400) and mRFP1                           | This study Addgene #217758                                                |
| pPRKCZ-C1-EGFP<br>(C-PRKCZ-C1)             | pEGFP-N1                    | Human PRKCZ C1 domain<br>(aa123-193)                                                                              | This study Addgene #217759                                                |
| pEGFP-PRKCZ-C1<br>(N-PRKCZ-C1)             | pEGFP-C1                    | Human PRKCZ C1 domain<br>(aa123-193)                                                                              | This study Addgene #217760                                                |
| pPRKCZ-C20-EGFP<br>(C-PRKCZ-C20)           | pEGFP-N1                    | 20 kD C-terminal domain (C20) of<br>human PRKCZ (aa405-646)                                                       | This study Addgene #217761                                                |
| pEGFP-PRKCZ-C20<br>(N-PRKCZ-C20)           | pEGFP-C1                    | 20 kD C-terminal domain (C20) of<br>human PRKCZ (aa405-646)                                                       | This study Addgene #217762                                                |
| pNES-PRKCZ-C20-EGFP<br>(C-NES-PRKCZ-C20)   | pPRKCZ-C20-<br>EGFP         | Nuclear export signal from<br>MAPKK preceding the 20 kD C-<br>terminal domain (C20) of human<br>PRKCZ (aa405-646) | This study Addgene #217763                                                |
| pSET-EMD-EGFP<br>(C-SET-EMD)               | pEGFP-N1                    | Human SET earmuff domain<br>(EMD) (aa70-226)                                                                      | This study Addgene #217764                                                |
| pEGFP-SET-EMD<br>(N-SET-EMD)               | pEGFP-C1                    | Human SET earmuff domain<br>(EMD) (aa70-226)                                                                      | This study Addgene #217765                                                |
| pNES-SET-EMD-EGFP<br>(C-NES-SET-EMD)       | pSET-EMD-EGFP               | Nuclear export signal from<br>MAPKK preceding the Human<br>SET earmuff domain (EMD)<br>(aa70-226)                 | This study Addgene #217770                                                |
| pETM11-His6-SUMO3-<br>sfGFP                |                             | His6-SUMO3-sfGFP                                                                                                  | Gavin laboratory [61]                                                     |
| pETM11-SUMO3-EGFP-<br>sfGFP                | pETM11-His6-<br>SUMO3-sfGFP | Super-folder-GFP (sfGFP)                                                                                          | Gavin laboratory [61]                                                     |
| pETM11-SUMO3-KSR1-<br>CA3-sfGFP<br>(C-KSR) | pETM11-His6-<br>SUMO3-sfGFP | Human KSR1 CA3 domain<br>(aa317-400)                                                                              | This study Addgene #217766                                                |
| pETM11-SUMO3-sfGFP-<br>KSR1-CA3<br>(N-KSR) | pETM11-His6-<br>SUMO3-sfGFP | Human KSR1 CA3 domain<br>(aa317-400)                                                                              | This study Addgene #217767                                                |
| pSBbi-pur H-2Kb                            | pSBbi-pur                   | H2Kb (murine MHC-I allele)                                                                                        | Addgene #111623 (Gift from<br>Yewdell laboratory)                         |
| pCMV(CAT)T7-SB100                          | pCMV                        | SB100X transposase                                                                                                | Addgene #34879 from [109]                                                 |
| pSbi-pur-KSR1-CA3-EGFP<br>(C-KSR)          | pSBbi-pur                   | Human KSR1 CA3 domain<br>(aa317-400)-EGFP<br>(C-KSR)                                                              | This study Addgene #217768                                                |
| pSbi-pur-EGFP-KSR1-CA3<br>(N-KSR)          | pSBbi-pur                   | EGFP-Human KSR1 CA3 domain<br>(aa317-400)<br>(N-KSR)                                                              | This study Addgene #217769                                                |
| FcγRIIA-cmyc                               | pcDNA3                      | Myc-tagged Fc receptor FcγRIIA<br>(FCGR2A)                                                                        | Gift from S. Grinstein<br>University of Toronto [111]                     |
| pGFP-PKC-C1(2)delta                        | pN2                         | GFP-N2-PKCdelta-C1(2) C1(2)<br>domains of PKC delta (rat)                                                         | Addgene #21216 [58]                                                       |
| pYFP-DBD                                   | pcDNA3                      | C1b diacylglycerol binding domain<br>(DBD) of rat PKC beta II                                                     | Addgene #14874 [60]                                                       |
| pCMV6-XL5-mCherry-STIM1                    | pCMV6-XL5                   | mCherry inserted after the signal<br>sequence of human STIM1                                                      | Gift from R. Lewis<br>Stanford University [108]                           |
| p-mCherry-Sec22b                           | pCMV-mCherry-<br>C1         | rat Sec22b (ERS24)<br>NM_001025686                                                                                | Gift from T. Galli/ C. Vannier,<br>Institute Jacques Monod Paris<br>[110] |
| pTag-RFP-C                                 |                             | Cytosolic TagRFP                                                                                                  | Evrogen FP141                                                             |
| pEGFP-N1                                   |                             | Vector for C-terminally tagged<br>EGFP constructs                                                                 | Clontech                                                                  |

|          |  |                                                |                                                                                      |
|----------|--|------------------------------------------------|--------------------------------------------------------------------------------------|
| pEGFP-C1 |  | Vector for N-terminally tagged EGFP constructs | Clontech                                                                             |
| pmRFP-N1 |  | Vector for C-terminally tagged mRFP constructs | Addgene #54635<br>Gift from Robert Campbell, Michael Davidson, and Roger Tsien [107] |

**Supplementary Table S3.** List of primers used in the study.

| Primer Name        | F/R | Sequence                                                             | Purpose                                                           |
|--------------------|-----|----------------------------------------------------------------------|-------------------------------------------------------------------|
| NheI_hKSR1_Ntag_F  | For | CTAAGCTAGCGCCACCATGGGGAACC<br>GCATTGATGACG                           | subcloning hKSR1(aa317-400) into pEGFP-N1                         |
| XhoI_hKSR1_Ntag_R  | Rev | GATGCTCGAGCCGAGTTAGTGGCAG<br>GAAGG                                   | subcloning hKSR1(aa317-400) into pEGFP-N1                         |
| XhoI_hKSR1_Ctag_F  | For | TACACTCGAGCTGGCGGTTCTCTGG<br>TGGTGGTGGTGCGGGGAACCGCATT<br>GATGACG    | subcloning hKSR1(aa317-400) into pEGFP-C1                         |
| KpnI_hKSR1_Ctag_R  | Rev | CACGGGTACCTTACCGAGTTAGTGGC<br>AGGAAGG                                | subcloning hKSR1(aa317-400) into pEGFP-C1                         |
| hKSR_CC359-362SS_F | For | GTGTCCCAGAAGAGCATGATATTTGG<br>AGTGAAG                                | to introduce mutations (C359S, C362S) into KSR1                   |
| hKSR_CC359-362SS_R | Rev | GTGGGAGACCTGCGACAGCCAGGA                                             | to introduce mutations (C359S, C362S) into KSR1                   |
| NheI_hPRKCZ_Ntag_F | For | CTAAGCTAGCGCCACCATGAGGAAGC<br>TGTACCGTGCCAAC                         | subcloning hPRKCZ(aa123-193) into pEGFP-N1                        |
| XhoI_hPRKCZ_Ntag_R | Rev | TACACTCGAGAGGCTCTTGGAAGGC<br>ATGAC                                   | subcloning hPRKCZ(aa123-193) into pEGFP-N1                        |
| XhoI_hPRKCZ_Ctag_F | For | CTGACTCGAGCTGGCGGTTCTCTGG<br>TGGTGGTGGTGCGAGGAAGCTGTAC<br>CGTGCCAAC  | subcloning hPRKCZ(aa123-193) into pEGFP-C1                        |
| KpnI_hPRKCZ_Ctag_R | Rev | GCGAGGTACCTTAAGGCTCTTGGGAA<br>GGCATGAC                               | subcloning hPRKCZ(aa123-193) into pEGFP-C1                        |
| NheI_hSET_Ntag_F   | For | ATTAGCTAGCGCCACCATGCAGAAGA<br>GGTCAGAAATTGATCG                       | subcloning hSET(aa70-226) into pEGFP-N1                           |
| XhoI_hSET_Ntag_R   | Rev | GACTCTCGAGATCCATATCGGGAACC<br>AAGTAG                                 | subcloning hSET(aa70-226) into pEGFP-N1                           |
| XhoI_hSET_Ctag_F   | For | AACGCTCGAGCTGGCGGTTCTCTGG<br>TGGTGGTGGTGCGCAGAAGAGGTCA<br>GAATTGATCG | subcloning hSET(aa70-226) into pEGFP-C1                           |
| KpnI_hSET_Ctag_R   | Rev | GACGGGTACCTTAATCCATATCGGGA<br>ACCAAGTAG                              | subcloning hSET(aa70-226) into pEGFP-C1                           |
| NheI-hPRKCZ-C20_F  | For | TACAGCTAGCGCCACCATGGGTGACA<br>CAACGAGCACTTTC                         | subcloning PRKCZ-C20 (aa 405-646) fragment into pEGFP-N1          |
| XhoI-hPRKCZ-C20_R  | Rev | GATGCTCGAGCGACTCCTCGGTGGA<br>CAGC                                    | subcloning PRKCZ-C20 (aa 405-646) fragment into pEGFP-N1          |
| XhoI-hPRKCZ-C20_F  | For | TACACTCGAGCTGGCGGTTCTCTGG<br>TGGTGGTGGTGCGGGTGACACAACG<br>AGCACTTTC  | subcloning PRKCZ-C20 (aa 405-646) fragment into pEGFP-C1          |
| KpnI-hPRKCZ-C20_R  | Rev | CAATGGTACCCGACTCCTCGGTGGAC<br>AGC                                    | subcloning PRKCZ-C20 (aa 405-646) fragment into pEGFP-C1          |
| XhoI-hKSR1-2X-F    | For | GAACCTCGAGGGGAACCGCATTGATG<br>ACG                                    | subcloning hKSR1(aa317-400) into pKSR1-EGFP                       |
| KpnI-hKSR1-2X-R    | Rev | TACAGGTACCGACCGAGTTAGTGGCA<br>GGAAGG                                 | subcloning hKSR1(aa317-400) into pKSR1-EGFP                       |
| PRKCZ_C-C20-NES-F  | For | GAGCTGGATGAGGCACCGGTGCGCA<br>CCGTGAGCAAGGGCGAGGAG                    | addition of MAPKK nuclear export signal to PRKCZ-C20-EGFP         |
| PRKCZ_C-C20-NES-R  | Rev | AAGCTCTTCCAACTTTTCTGCAGAGC<br>CATGGTGGCGACCGGTAG                     | addition of MAPKK nuclear export signal to PRKCZ-C20-EGFP         |
|                    |     |                                                                      |                                                                   |
| SET_N-C20-NES-F    | For | GAGCTGGATGAGGCACCGGTGCGCA<br>CCCAGAAGAGGTGAGCAATTGATCGCC             | addition of MAPKK nuclear export signal to SET-EGFP               |
| SET_N-C20-NES-R    | Rev | AAGCTCTTCCAACTTTTCTGCAGAGC<br>CATGGTGGCGCTAGCGGA                     | addition of MAPKK nuclear export signal to SET-EGFP               |
| pETM11-lin-F       | For | ACTGAGATCCGGCTGCTAAC                                                 | linearization of vector pETM11-SUMO3-EGFP-sfGFP (Gibson assembly) |

|                    |     |                                                    |                                                                                                                          |
|--------------------|-----|----------------------------------------------------|--------------------------------------------------------------------------------------------------------------------------|
| pETM11-lin-R       | Rev | GGATCCACCGGTCTGTTGC                                | linearization of vector pETM11-SUMO3-EGFP-sfGFP (Gibson assembly)                                                        |
| KSR-EGFP-F         | For | CAACAGACCGGTGGATCCGGAACC<br>GCATTGATGACG           | KSR1 insert amplification to subclone into linearized pETM11-SUMO3-EGFP-sfGFP via Gibson assembly                        |
| EGFP-R             | Rev | TAGCAGCCGGATCTCAGTTTACTTGT<br>ACAGCTCGTCCATG       | insert amplification to subclone EGFP-tagged probes into a linearized vector pETM11-SUMO3-EGFP-sfGFP via Gibson assembly |
| SfiI-KSR1-F        | For | CATGGCCACAGGGCCTGGGAACC<br>GCATTGATGACG            | for subcloning KSR1 fragment onto SfiI sites of vector pETM11-SUMO3-SfiI-sfGFP                                           |
| SfiI-KSR1-R        | Rev | TACGGCCGATATGGCCTTACCGAGTT<br>AGTGGCAGGAAGG        | for subcloning KSR1 fragment onto SfiI sites of vector pETM11-SUMO3-SfiI-sfGFP                                           |
| SfiI-probe-EGFP-F  | For | CGTGGCCTCTGAGGCCTGAACCGTCA<br>GATCCGCTAG           | subcloning C-terminally tagged KSR1 into pSBbi-pur                                                                       |
| SfiI-probe-EGFP-R  | Rev | TACGGCCTGACAGGCCTTACTTGTAC<br>AGCTCGTCCATG         | subcloning C-terminally tagged KSR1 into pSBbi-pur                                                                       |
| C-KSR-GSplus-mut-F | For | gggtggtggtgcgTCGACGGTACCGCGGGC<br>C                | deletes LELKLRLQS linker connecting KSR1 CA3 domain to EGFP (in C-KSR constructs) and adds GGSSGGGGA linker.             |
| C-KSR-GSplus-mut-R | Rev | accagaggaaccgccCCGAGTTAGTGGCA<br>GGAAGGATATTCTACAG | deletes LELKLRLQS linker connecting KSR1 CA3 domain to EGFP (in C-KSR constructs) and adds GGSSGGGGA linker.             |

\*For = forward, Rev = reverse, F/R = forward or reverse

**Supplementary Table S4.** Lipid detection parameters for lipidomic analysis

| Lipid class                                 | Standard | Polarity | Mode             | m/z ion    | Collision energy eV |
|---------------------------------------------|----------|----------|------------------|------------|---------------------|
| Phosphatidylcholine [M+H] <sup>+</sup>      | DLPC     | +        | Product ion      | 184.07     | 30                  |
| Phosphatidylethanolamine [M+H] <sup>+</sup> | PE31:1   | +        | Neutral ion loss | 141.02     | 20                  |
| Phosphatidylinositol [M-H] <sup>-</sup>     | PI31:1   | -        | Product ion      | 241.01     | 44                  |
| Phosphatidylserine [M-H] <sup>-</sup>       | PS31:1   | -        | Neutral ion loss | 87.03      | 23                  |
| Cardiolipin [M-2H] <sup>2-</sup>            | CL56:0   | -        | Product ion      | Acyl chain | 32                  |
| Ceramide                                    | C17Cer   | +        | Product ion      | 264.34     | 25                  |
| Hexosylceramide                             | C8GC     | +        | Product ion      | 264.34     | 30                  |
| Sphingomyelin                               | C12SM    | +        | Product ion      | 184.07     | 26                  |
